# Supplementary material
Source: PubMed Central journal article supplement (PMC3760077)
Supplement: Supp_Figure2.pdf [file Supp_Figure2.pdf]

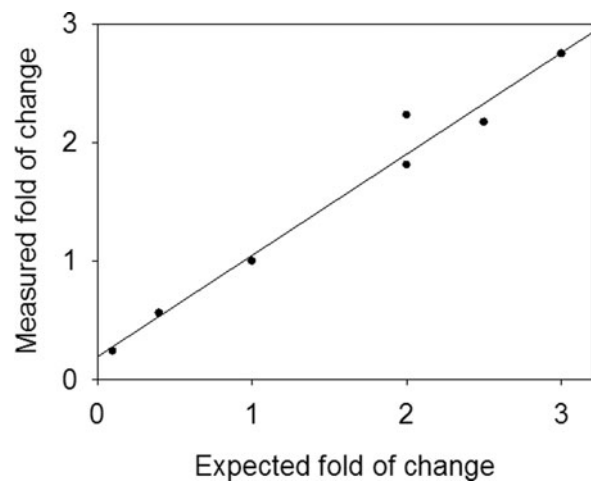

**SUPPLEMENTARY FIG. S2.** Detection power of folate measurement with the established protocol and standard curves. A strong correlation was observed for 10-CHO-THF between the fold increase for the added folate standards (x-axis) and the fold increase for the folate measured (y-axis) using established protocols and standard curves. The amount of 10-CHO-THF ranged from 10 nM (0.5 pmole) to 120 nM (6 pmole). The correlation coefficients ( $r^2$ ) is 0.998.
