# Supplementary material
Source: PubMed Central journal article supplement (PMC3760077)
Supplement: Supp_Figure4.pdf [file Supp_Figure4.pdf]

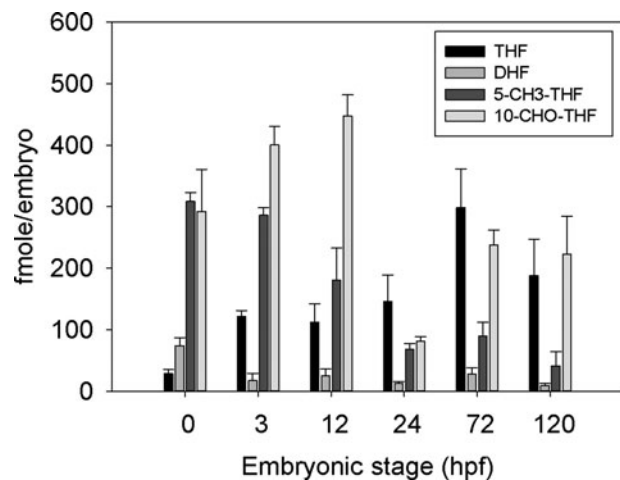

**SUPPLEMENTARY FIG. S4.** Individual folate contents in zebrafish embryos of different stages are varied. Zebrafish embryos were collected at indicated stages and subjected to folate extraction and measurement for individual folate adducts with high-performance liquid chromatography. Data presented are averages of at least three independent repeats with different batches of embryos.
